# Supplementary material for: Omics for understanding the tolerant mechanism of Trichoderma asperellum TJ01 to organophosphorus pesticide dichlorvos
Source: BMC Genomics. 2018 Aug 8;19:596. doi: 10.1186/s12864-018-4960-y (PMC6083568; doi:10.1186/s12864-018-4960-y)
Supplement: Supplementary file 4 — Impact of 500 μg/mL dichlorvos on lipid metabolism of T. asperellum TJ01 after 24 h treatment based on LC-QQQ-MS and GC-TOF-MS analysis. Red represents up-regulated significantly, while blue represents down-regulated significantly. (XLS 11 kb) [file 12864_2018_4960_MOESM4_ESM.xls]

## Sheet: Sheet1
Test	Compounds	VIP	P-Value	Log_Fold Change
LC-QQQ-MS-POS	LPC (1-acyl 12:1)	1.37031	0.016283	9.66941
LC-QQQ-MS-POS	LysoPC 16:2	1.32326	0.000738	2.94942
LC-QQQ-MS-POS	LysoPC 14:0 (2n isomer)	1.23103	0.025233	1.79758
LC-QQQ-MS-POS	LysoPC 16:1 (2n isomer)	1.33746	0.000225	2.53857
LC-QQQ-MS-POS	LysoPC 16:0 (2n isomer)	1.32694	0.000488	1.7645
LC-QQQ-MS-POS	LysoPC 18:3 (2n isomer)	1.32437	0.000592	1.10992
LC-QQQ-MS-POS	LysoPC 20:4	1.19405	0.014361	0.523567
LC-QQQ-MS-POS	LysoPC 20:2 (2n isomer)	1.22678	0.006498	0.968537
LC-QQQ-MS-POS	LysoPC 20:0 (2n isomer)	1.272	0.002476	1.93281
LC-QQQ-MS-POS	LysoPC 20:0	1.29523	0.010452	1.75763
LC-QQQ-MS-POS	LysoPC 22:6	1.37017	0.007123	10.0968
LC-QQQ-MS-POS	LysoPC 18:2 (isomer)	1.25405	0.001975	1.29644
LC-QQQ-MS-POS	Lyso PC 14:0	1.31122	0.004826	2.5762
LC-QQQ-MS-POS	LysoPC 16:1	1.29484	0.006917	2.03655
LC-QQQ-MS-POS	LysoPE 15:2	1.12634	0.047587	-0.310919
LC-QQQ-MS-POS	LysoPC 18:1 (isomer)	1.24686	0.003192	1.01167
LC-QQQ-MS-POS	LysoPC 18:2 (2n isomer)	1.24303	0.029073	-0.847186
LC-QQQ-MS-POS	LysoPC 18:3	1.31279	0.000663	1.21692
LC-QQQ-MS-POS	LysoPC 16:0	1.23725	0.020413	-0.505164
LC-QQQ-MS-POS	LysoPC 20:2	1.18188	0.013774	0.690994
LC-QQQ-MS-POS	LysoPC 18:0	1.32387	0.000692	0.904974
LC-QQQ-MS-POS	LysoPC 20:1 (2n isomer)	1.31929	0.001366	1.95293
LC-QQQ-MS-POS	LysoPC 20:1	1.32372	0.001955	1.56233
LC-QQQ-MS-POS	1-Monopalmitin	1.31579	0.001898	2.59359
LC-QQQ-MS-POS	1-Decanoyl-2-hydroxy-sn-glycero-3-phosphocholine	1.17487	0.008164	1.40373
LC-QQQ-MS-POS	delta-Undecalactone	1.2981	0.002767	1.51497
LC-QQQ-MS-POS	MG (linoleic acid)	1.31743	0.001563	2.25812
LC-QQQ-MS-NEG	LysoPE 14:0 (2n isomer)	1.2459	0.028494	1.3329
LC-QQQ-MS-NEG	LysoPE 14:0	1.3408	0.000752	2.3124
LC-QQQ-MS-NEG	LysoPS 20:0	1.30393	0.003218	2.36785
LC-QQQ-MS-NEG	LysoPE 16:0 (2n isomer)	1.22386	0.012471	0.995382
LC-QQQ-MS-NEG	LysoPE 16:0	1.33832	8.6e-05	-1.50592
LC-QQQ-MS-NEG	LysoPE 18:1 (2n isomer)	1.27335	0.002012	0.979875
LC-QQQ-MS-NEG	LysoPG 18:1	1.2788	0.012389	1.49478
LC-QQQ-MS-NEG	13-HpOTrE(r)	1.3398	0.00076	2.1001
LC-QQQ-MS-NEG	13-HODE	1.23549	0.007639	0.953654
LC-QQQ-MS-NEG	9-KODE	1.05657	0.041707	-0.749812
LC-QQQ-MS-NEG	Myristoleic acid (C14:1)	1.15519	0.039267	0.216631
GC-TOF-MS	palmitoleic acid	1.93882	5.3e-05	3.57293
GC-TOF-MS	heptadecanoic acid	1.99364	4.3e-05	1.74496
GC-TOF-MS	Behenic acid	1.16759	0.028491	1.26588
GC-TOF-MS	pentadecanoic acid	1.72202	0.007907	1.56563
GC-TOF-MS	Myristic Acid	1.4732	0.034298	1.04638
GC-TOF-MS	phytosphingosine 2	1.6571	0.000849	2.30474
